# Supplementary material for: Health Care Costs Associated to Type of Feeding in the First Year of Life
Source: MDPI journal article supplement (doi:10.3390/ijerph17134719), 2020-06-30
Supplement: s1 [file s1]

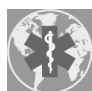

**Supplementary Table S1.** Admissions to hospital in the first year of life. All patient refined—Diagnosis Related Groups, severity, weight, and cost.

| APR-DRG * | Description                                                                                                   | Severity | Weight ** | Normalized Cost (€/Patient) *** | Number of Patients | Total Cost **** |
|-----------|---------------------------------------------------------------------------------------------------------------|----------|-----------|---------------------------------|--------------------|-----------------|
| 113       | Infections of upper respiratory tract                                                                         | 1        | 0.2701    | 1357.4094                       | 4                  | 5429.6376       |
| 138       | RSV pneumonia                                                                                                 | 1        | 0.2731    | 1372.4862                       | 10                 | 13,724.862      |
| 139       | Other pneumonia                                                                                               | 1        | 0.39      | 1959.9766                       | 1                  | 1959.9766       |
| 141       | Bronchiolitis and asthma                                                                                      | 1        | 0.345     | 1733.8254                       | 3                  | 5201.4762       |
| 141       | Bronchiolitis and asthma                                                                                      | 2        | 0.51      | 2563.0463                       | 1                  | 2563.0463       |
| 144       | Respiratory signs, symptoms and minor diagnoses                                                               | 1        | 0.4281    | 2151.4512                       | 2                  | 4301.9024       |
| 249       | Non-bacterial gastroenteritis, nausea and vomiting                                                            | 1        | 0.3694    | 1856.4496                       | 3                  | 5569.3488       |
| 249       | Non-bacterial gastroenteritis, nausea and vomiting                                                            | 2        | 0.48      | 2412.28                         | 2                  | 4824.56         |
| 385       | Other skin, subcutaneous tissue and breast disorders                                                          | 1        | 0.3755    | 1887.1057                       | 1                  | 1887.1057       |
| 463       | Kidney and urinary tract infections                                                                           | 1        | 0.3999    | 2009.7298                       | 1                  | 2009.7298       |
| 602       | Neonate birthweight 1000–1249 g with respiratory distress syndrome / other major respiratory or major anomaly | 3        | 8.7849    | 44,149.227                      | 1                  | 44,149.227      |
| 609       | Neonate birthweight 1500–2499 g with major procedure                                                          | 2        | 14.0684   | 70,701.884                      | 1                  | 70,701.884      |
| 611       | Neonate birthweight 1500–1999 g with major anomaly                                                            | 1        | 2.9476    | 14,813.403                      | 1                  | 14,813.403      |
| 640       | Neonate birthweight >2499 g, normal newborn or neonate with other problem                                     | 2        | 0.1371    | 689.00716                       | 1                  | 689.00716       |
| 710       | Infectious & parasitic diseases including HIV with O.R. procedure                                             | 1        | 1.0636    | 5345.208                        | 1                  | 5345.208        |
| 722       | Fever                                                                                                         | 1        | 0.3436    | 1726.7896                       | 1                  | 1726.7896       |
| 723       | Viral illness                                                                                                 | 1        | 0.3265    | 1640.8522                       | 3                  | 4922.5566       |
| 724       | Other infectious and parasitic diseases                                                                       | 1        | 0.5869    | 2949.5135                       | 4                  | 11,798.054      |
| 724       | Other infectious and parasitic diseases                                                                       | 2        | 0.7139    | 3587.7623                       | 1                  | 3587.7623       |
| 861       | Signs, symptoms and other factors influencing health status                                                   | 1        | 0.3815    | 1917.2588                       | 1                  | 1917.2588       |

\* APR-DRG: All patients refined—Diagnosis Related Groups. \*\* Weight—according to the Spanish Norm for APR-GDRs [26]. \*\*\* Normalized cost = weight × 5025.58€ (according to the Spanish Norm for APR-GDRs[26]). \*\*\*\* Total cost = normalized cost × number of patients.

**Supplementary Table S2.** Relationship between type of feeding and costs due to treatment with drugs.

| Time               | Type of Feeding                    | <i>n</i> | Average Cost (€) * | 95% CI* |       | <i>p</i> * |
|--------------------|------------------------------------|----------|--------------------|---------|-------|------------|
| Hospital Discharge | Exclusive breastfeeding            | 524      | 6.64               | 5.86    | 7.42  |            |
|                    | Mixed breastfeeding and artificial | 272      | 6.55               | 5.51    | 7.60  | 0.90       |
|                    | Artificial                         | 174      | 8.81               | 7.46    | 10.17 | 0.007      |
| 2 Months           | Exclusive breastfeeding            | 427      | 6.32               | 5.48    | 7.16  |            |
|                    | Mixed breastfeeding and artificial | 183      | 6.84               | 5.58    | 8.10  | 0.50       |
|                    | Artificial                         | 299      | 8.07               | 7.06    | 9.09  | 0.01       |
| 4 Months           | Exclusive breastfeeding            | 354      | 5.92               | 4.99    | 6.84  |            |
|                    | Mixed breastfeeding and artificial | 164      | 6.70               | 5.37    | 8.03  | 0.34       |
|                    | Artificial                         | 387      | 8.14               | 7.25    | 9.04  | 0.001      |
| 6 Months           | Exclusive breastfeeding            | 238      | 5.71               | 4.60    | 6.84  |            |
|                    | Mixed breastfeeding and artificial | 183      | 6.22               | 4.96    | 7.47  | 0.56       |
|                    | Artificial                         | 483      | 7.96               | 7.17    | 8.75  | 0.002      |
| 9 Months           | Exclusive breastfeeding            | 0        |                    |         |       |            |
|                    | Mixed breastfeeding and artificial | 318      | 5.86               | 4.89    | 6.83  |            |
|                    | Artificial                         | 573      | 7.76               | 7.04    | 8.49  | 0.002      |
| 12 Months          | Exclusive breastfeeding            | 0        |                    |         |       |            |
|                    | Mixed breastfeeding and artificial | 239      | 5.72               | 4.60    | 6.84  |            |
|                    | Artificial                         | 642      | 7.64               | 6.95    | 8.32  | 0.004      |

\* Total number of neonates does not add to 770 due to missing data in the follow-up. \*\* Marginal means adjusted for maternal smoking, maternal educational level, maternal occupational status, twin pregnancy, gestation length, birth order, nursery attendance (yes/no) and age of starting nursery attendance.
